# Supplementary material for: Predictors of Major Depression and Posttraumatic Stress Disorder Following Traumatic Brain Injury: A Systematic Review and Meta-Analysis
Source: Atypon-hosted journal article supplement (doi:10.1176/appi.neuropsych.16090165), 2017-02-14
Supplement: appi.neuropsych.16090165.ds001.pdf [file appi.neuropsych.16090165.ds001.pdf]

## Supplemental material A: Search strategy

Embase.com

('brain injury'/exp OR 'brain injury assessment'/exp OR 'head injury'/exp OR concussion/exp OR coma/exp OR (((brain OR head OR crani\* OR intracrani\* OR skull\* OR cerebr\* OR capitis OR hemisphere\*) NEAR/3 (injur\* OR trauma\* OR posttrauma\* OR damag\* OR lesion\* OR fracture\*)) OR concus\* OR contus\* OR neurotraum\* OR tbi OR mtbi OR coma\*):ab,ti) AND (injury/exp OR 'posttraumatic stress disorder'/exp OR accident/exp OR emergency/exp OR 'emergency care'/exp OR 'emergency ward'/exp OR violence/exp OR (trauma\* OR posttrauma\* OR injur\* OR tbi OR mtbi OR accident\* OR emergen\* OR violen\*):ab,ti) AND (anxiety/exp OR 'mood disorder'/de OR 'anxiety disorder'/exp OR depression/exp OR 'mental health'/de OR 'psychological well being'/de OR "Diagnostic and Statistical Manual of Mental Disorders" OR (anxi\* OR ((mood OR affective) NEAR/3 (disorder\* OR disturb\*)) OR phobi\* OR agoraphobi\* OR panic OR ocd OR (obsessi\* NEAR/3 compulsi\*) OR depress\* OR ((posttraumatic OR post-traumatic OR postconcussion\* OR post-concussional OR post-concussion) NEAR/3 (stress\* OR syndrom\*)) OR dysthymi\* OR ptsd OR ((psychologic\* OR neuropsychologic\* OR emotion\*) NEAR/3 (outcome\* OR develop\* OR well-being OR wellbeing OR disabil\* OR progres\* OR adjust\* OR function\* OR consequenc\* OR sequel\*)) OR 'mental health' OR dsm ):ab,ti) AND (prevalence/exp OR incidence/exp OR 'prediction and forecasting'/exp OR interview/exp OR epidemiology/de OR 'risk factor'/exp OR (incidenc\* OR prevalen\* OR predict\* OR prognos\* OR interview\* OR (risk NEAR/3 factor\*)) OR epidemiolog\* OR ((indicator\* OR variable\* OR characteristic\* OR examination\* OR assessment\* OR measure\* OR association\* OR determinant\*) NEAR/3 psycholog\*) OR psychometric\*):ab,ti) NOT ([Conference Abstract]/lim OR [Letter]/lim OR [Note]/lim OR [Conference Paper]/lim OR [Editorial]/lim) AND [english]/lim NOT ([animals]/lim NOT [humans]/lim)

Medline (OvidSP)

(exp Craniocerebral Trauma/ OR Glasgow Coma Scale/ OR coma/ OR (((brain OR head OR crani\* OR intracrani\* OR skull\* OR cerebr\* OR capitis OR hemisphere\*) ADJ3 (injur\* OR trauma\* OR posttrauma\* OR damag\* OR lesion\* OR fracture\*)) OR concus\* OR contus\* OR neurotraum\* OR tbi OR mtbi OR coma\*).ab,ti.) AND (exp Wounds and Injuries/ OR exp Stress Disorders, Traumatic/ OR exp accidents/ OR exp Emergencies/ OR exp Emergency Treatment/ OR exp Emergency Service, Hospital/ OR exp violence/ OR (trauma\* OR posttrauma\* OR injur\* OR tbi OR mtbi OR accident\* OR emergen\* OR violen\*).ab,ti.) AND (exp anxiety/ OR exp mood disorders/ OR exp anxiety disorder/ OR exp depression/ OR exp mental health/ OR Personal Satisfaction/ OR "Diagnostic and Statistical Manual of Mental Disorders" OR (anxi\* OR ((mood OR affective) ADJ3 (disorder\* OR disturb\*)) OR phobi\* OR agoraphobi\* OR panic OR ocd OR (obsessi\* ADJ3 compulsi\*) OR depress\* OR ((posttraumatic OR post-traumatic OR postconcussion\* OR post-concussional OR post-concussion) ADJ3 (stress\* OR

syndrom\*) OR dysthymi\* OR ptsd OR ((psychologic\* OR neuropsychologic\* OR emotion\*) ADJ3 (outcome\* OR develop\* OR well-being OR wellbeing OR disabil\* OR progres\* OR adjust\* OR function\* OR consequenc\* OR sequel\*)) OR mental health OR dsm ).ab,ti.) AND (exp prevalence/ OR exp incidence/ OR Prognosis/ OR exp Interviews as Topic/ OR epidemiology/ OR epidemiology.xs. OR exp risk factors/ OR (incidenc\* OR prevalen\* OR predict\* OR prognos\* OR interview\* OR (risk ADJ3 factor\*) OR epidemiolog\* OR ((indicator\* OR variable\* OR characteristic\* OR examination\* OR assessment\* OR measure\* OR association\* OR determinant\*) ADJ3 psycholog\*) OR psychometric\*).ab,ti. ) NOT (letter OR news OR comment OR editorial OR congresses OR abstracts).pt. AND english.la. NOT (exp animals/ NOT humans/)

PsyclINFO (OvidSP)

(exp Head Injuries/ OR Brain Damage/ OR coma/ OR (((brain OR head OR crani\* OR intracrani\* OR skull\* OR cerebr\* OR capitis OR hemisphere\*) ADJ3 (injur\* OR trauma\* OR posttrauma\* OR damag\* OR lesion\* OR fracture\*)) OR concus\* OR contus\* OR neurotraum\* OR tbi OR mtbi OR coma\*).ab,ti.) AND (exp Injuries/ OR exp Posttraumatic Stress Disorder/ OR exp accidents/ OR exp trauma/ OR exp Emergency Services/ OR exp Emergency Management/ OR exp violence/ OR (trauma\* OR posttrauma\* OR injur\* OR tbi OR mtbi OR accident\* OR emergen\* OR violen\*).ab,ti.) AND (exp anxiety/ OR exp affective disorders/ OR exp anxiety disorders/ OR exp "Depression (Emotion)"/ OR exp mental health/ OR Satisfaction/ OR "Diagnostic and Statistical Manual" OR (anxi\* OR ((mood OR affective) ADJ3 (disorder\* OR disturb\*)) OR phobi\* OR agoraphobi\* OR panic OR ocd OR (obsessi\* ADJ3 compulsi\*) OR depress\* OR ((posttraumatic OR post-traumatic OR postconcussion\* OR post-concussional OR post-concussion) ADJ3 (stress\* OR syndrom\*)) OR dysthymi\* OR ptsd OR ((psychologic\* OR neuropsychologic\* OR emotion\*) ADJ3 (outcome\* OR develop\* OR well-being OR wellbeing OR disabil\* OR progres\* OR adjust\* OR function\* OR consequenc\* OR sequel\*)) OR mental health OR dsm ).ab,ti.) AND (Prognosis/ OR exp Interviews/ OR exp epidemiology/ OR exp risk factors/ OR (incidenc\* OR prevalen\* OR predict\* OR prognos\* OR interview\* OR (risk ADJ3 factor\*) OR epidemiolog\* OR ((indicator\* OR variable\* OR characteristic\* OR examination\* OR assessment\* OR measure\* OR association\* OR determinant\*) ADJ3 psycholog\*) OR psychometric\*).ab,ti. ) NOT book.pt. AND english.la. NOT (exp animals/ NOT humans/)

Cochrane

(((((brain OR head OR crani\* OR intracrani\* OR skull\* OR cerebr\* OR capitis OR hemisphere\*) NEAR/3 (injur\* OR trauma\* OR posttrauma\* OR damag\* OR lesion\* OR fracture\*)) OR concus\* OR contus\* OR neurotraum\* OR tbi OR mtbi OR coma\*):ab,ti) AND ((trauma\* OR posttrauma\* OR injur\* OR tbi OR mtbi OR accident\* OR emergen\* OR violen\*):ab,ti) AND ((anxi\* OR ((mood OR affective) NEAR/3 (disorder\* OR disturb\*)) OR phobi\* OR agoraphobi\* OR panic OR ocd OR (obsessi\* NEAR/3 compulsi\*) OR

depress\* OR ((posttraumatic OR post-traumatic OR postconcussion\* OR post-concussional OR post-concussion) NEAR/3 (stress\* OR syndrom\*)) OR dysthymi\* OR ptsd OR ((psychologic\* OR neuropsychologic\* OR emotion\*) NEAR/3 (outcome\* OR develop\* OR well-being OR wellbeing OR disabil\* OR progres\* OR adjust\* OR function\* OR consequenc\* OR sequel\*)) OR 'mental health' OR dsm ):ab,ti) AND ((incidenc\* OR prevalen\* OR predict\* OR prognos\* OR interview\* OR (risk NEAR/3 factor\*) OR epidemiolog\* OR ((indicator\* OR variable\* OR characteristic\* OR examination\* OR assessment\* OR measure\* OR association\* OR determinant\*) NEAR/3 psycholog\*) OR psychometric\*):ab,ti )

PubMed publisher

(CranioCerebral Trauma[mh] OR Glasgow Coma Scale[mh] OR coma[mh] OR (((brain OR head OR crani\*[tiab] OR intracrani\*[tiab] OR skull\*[tiab] OR cerebr\*[tiab] OR capitis OR hemisphere\*[tiab]) AND (injur\*[tiab] OR trauma\*[tiab] OR posttrauma\*[tiab] OR damag\*[tiab] OR lesion\*[tiab] OR fracture\*[tiab])) OR concus\*[tiab] OR contus\*[tiab] OR neurotraum\*[tiab] OR tbi OR mtbi OR coma\*[tiab])) AND (Wounds and Injuries[mh] OR Stress Disorders, Traumatic[mh] OR accidents[mh] OR Emergencies[mh] OR Emergency Treatment[mh] OR Emergency Service, Hospital[mh] OR violence[mh] OR (trauma\*[tiab] OR posttrauma\*[tiab] OR injur\*[tiab] OR tbi OR mtbi OR accident\*[tiab] OR emergen\*[tiab] OR violen\*[tiab])) AND (anxiety[mh] OR mood disorders[mh] OR anxiety disorder[mh] OR depression[mh] OR mental health[mh] OR Personal Satisfaction[mh] OR "Diagnostic and Statistical Manual of Mental Disorders" OR (anxi\*[tiab] OR ((mood OR affective) AND (disorder\*[tiab] OR disturb\*[tiab]))) OR phobi\*[tiab] OR agoraphobi\*[tiab] OR panic OR ocd OR (obsessi\*[tiab] AND compulsi\*[tiab]) OR depress\*[tiab] OR ((posttraumatic OR post-traumatic OR postconcussion\*[tiab] OR post-concussional OR post-concussion) AND (stress\*[tiab] OR syndrom\*[tiab])) OR dysthymi\*[tiab] OR ptsd OR ((psychologic\*[tiab] OR neuropsychologic\*[tiab] OR emotion\*[tiab]) AND (outcome\*[tiab] OR develop\*[tiab] OR well-being OR wellbeing OR disabil\*[tiab] OR progres\*[tiab] OR adjust\*[tiab] OR function\*[tiab] OR consequenc\*[tiab] OR sequel\*[tiab])) OR mental health OR dsm )) AND (prevalence[mh] OR incidence[mh] OR Prognosis[mh] OR Interviews as Topic[mh] OR epidemiology[mh] OR epidemiology[sh] OR risk factors[mh] OR (incidenc\*[tiab] OR prevalen\*[tiab] OR predict\*[tiab] OR prognos\*[tiab] OR interview\*[tiab] OR (risk AND factor\*[tiab]) OR epidemiolog\*[tiab] OR ((indicator\*[tiab] OR variable\*[tiab] OR characteristic\*[tiab] OR examination\*[tiab] OR assessment\*[tiab] OR measure\*[tiab] OR association\*[tiab] OR determinant\*[tiab]) AND psycholog\*[tiab] OR psychometric\*[tiab])) ) NOT (letter[pt] OR news[pt] OR comment[pt] OR editorial[pt] OR congresses[pt] OR abstracts[pt]) AND english[la] NOT (animals[mh] NOT humans[mh]) AND publisher[sb]

Google scholar

"brain|head|cranial|cerebral injury|trauma|fracture"|concussion|contusion|coma

trauma|traumatic|posttraumatic|injury|accident anxiety|"mood disorder"|depression|"mental health"|psychological|dsm

prevalence|incidence|epidemiology|"risk factor"|prognosis

## Supplemental material B: meta-analyses of univariable predictors of MDD and PTSD

### B1. Meta-analyses of univariable predictors of MDD

#### Demographics

#### 1. Age (continuous, in years) as predictor of MDD

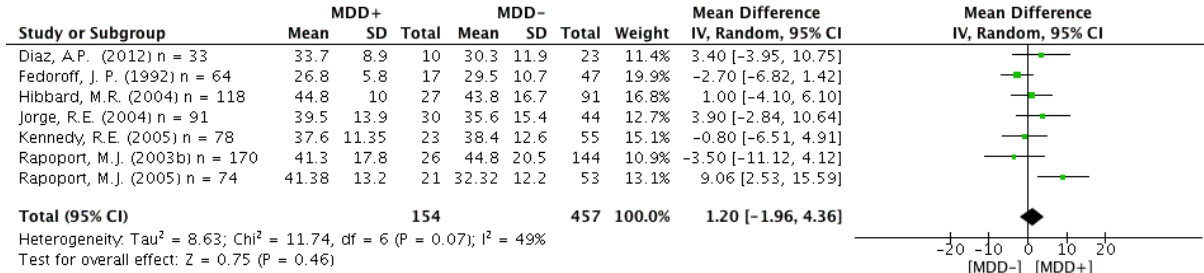

#### 2. Female gender as predictor of MDD

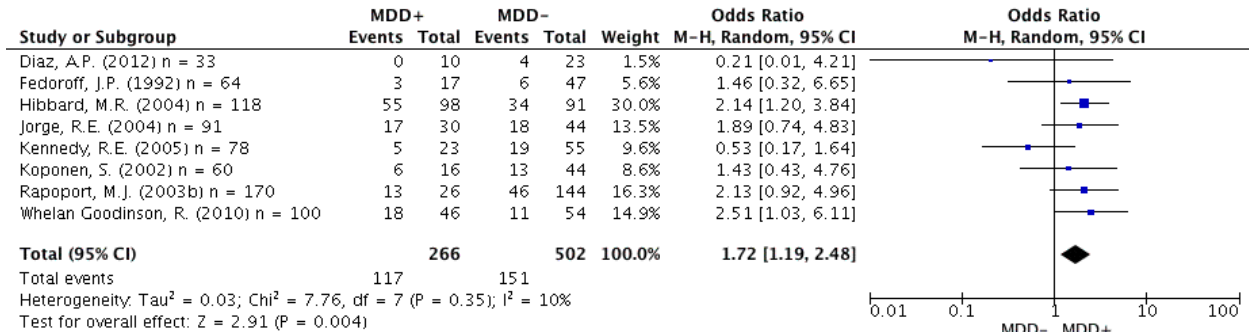

#### 3. Education (continuous, in years) as predictor of MDD

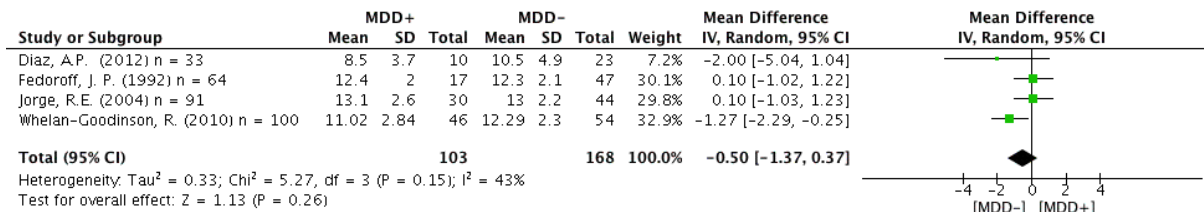

#### 4. Caucasian race as predictor of MDD

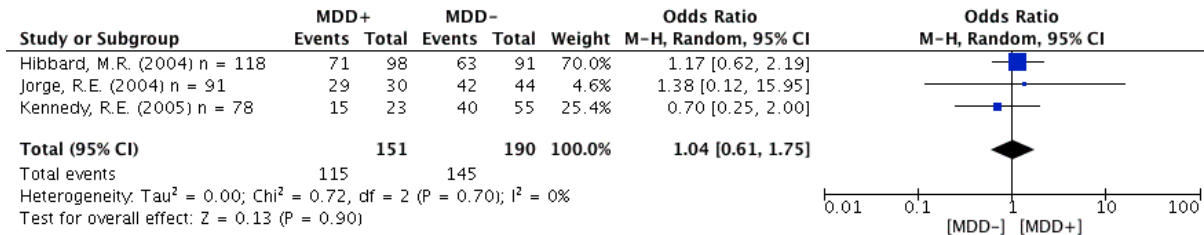

#### 5. Marital status (married / relationship vs. unattached) as predictor of MDD

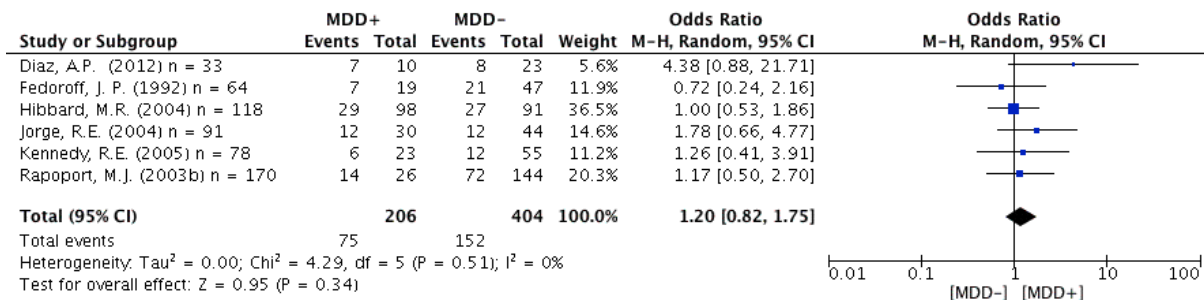

#### 6. Socioeconomic status (Hollingshead classes IV and V vs. lower) as predictor of MDD

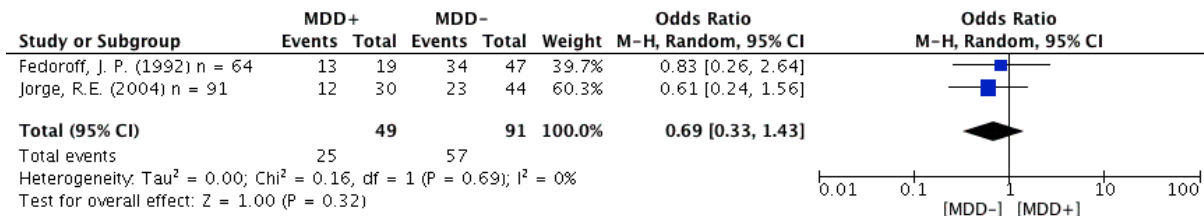

### Pre-injury variables

#### 7. Pre-injury depression as predictor of MDD

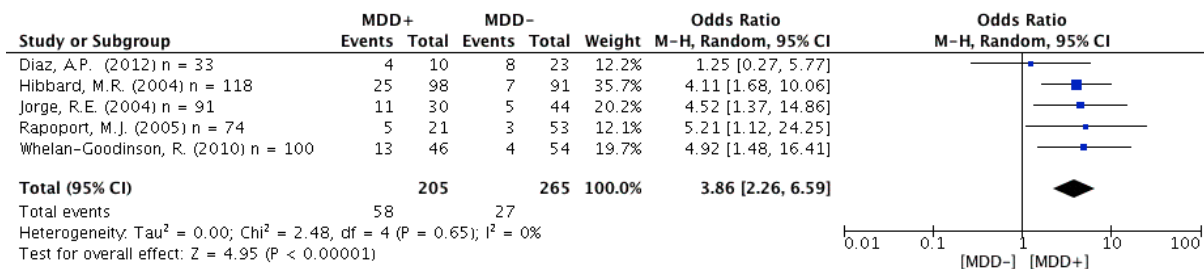

### 8. Pre-injury psychiatric disorders as predictor of MDD

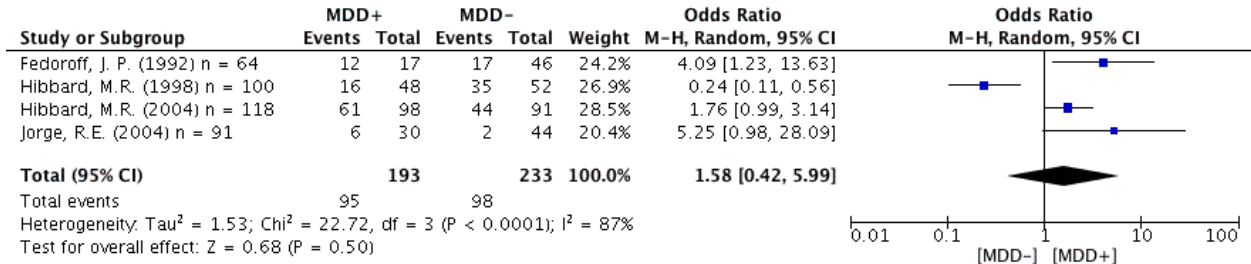

### 9. Pre-injury alcohol abuse as predictor of MDD

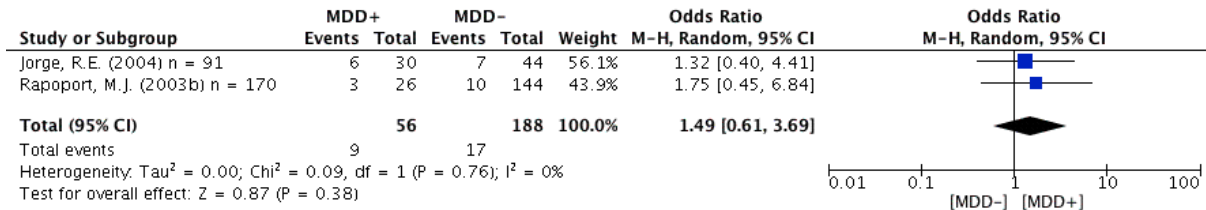

### 10. Pre-injury substance abuse as predictor of MDD

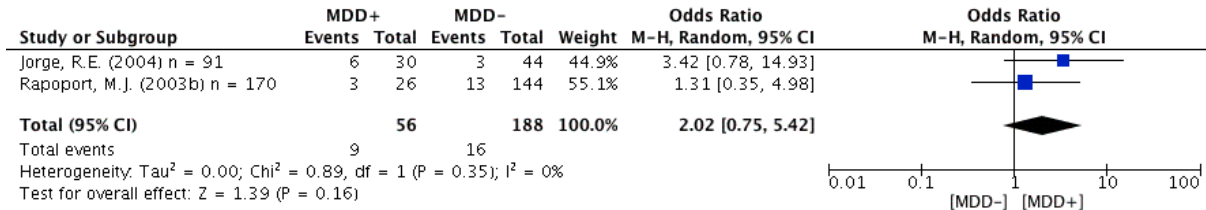

### 11. Pre-injury unemployment as predictor of MDD

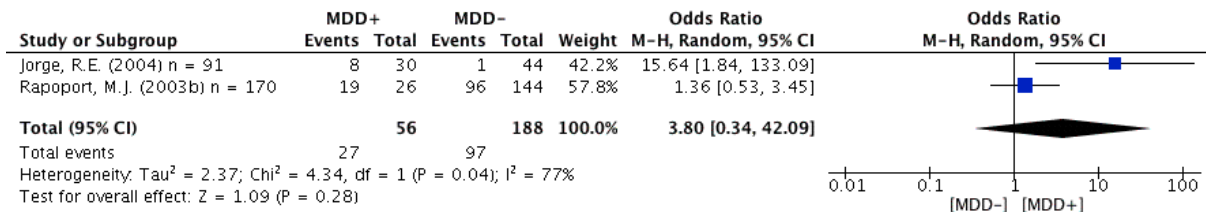

## 12. Family history of psychiatric disorders as predictor of MDD

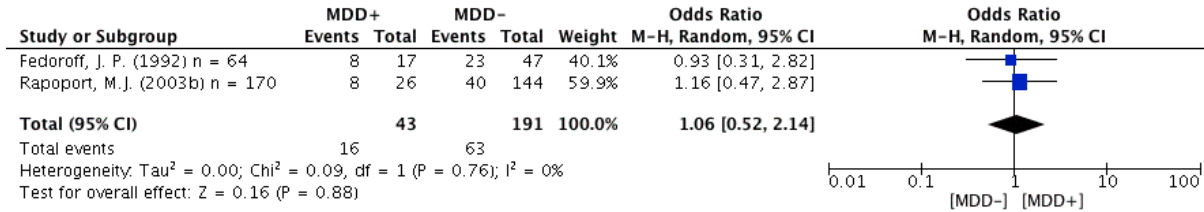

## Clinical variables and imaging

## 13. Admission GCS as predictor of MDD

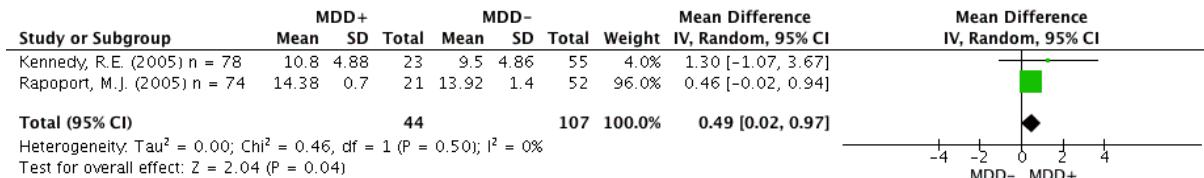

## 14. GCS after 24h post-injury as predictor of MDD

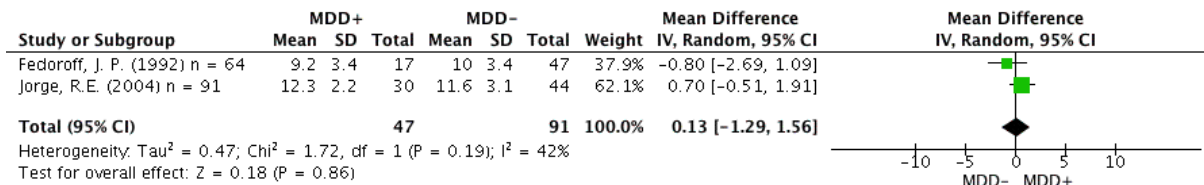

## 15. CT abnormalities as predictor of MDD

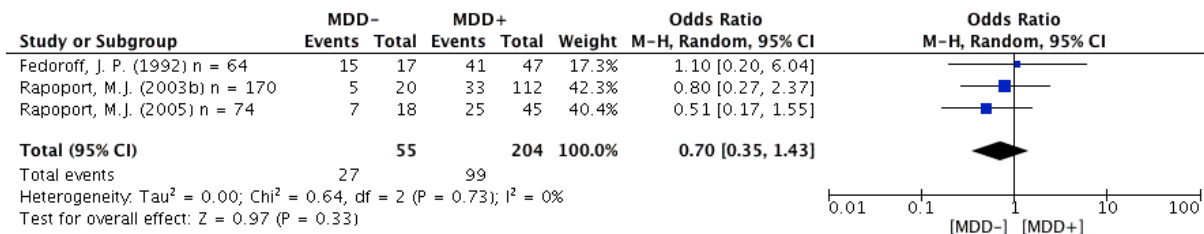



## 16. Brain Contusion as predictor of MDD

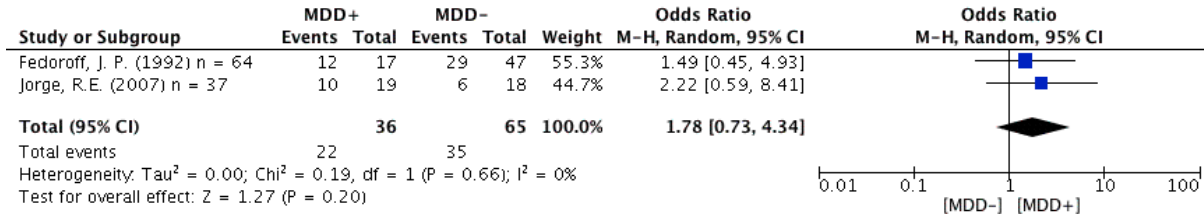

### Post-injury variables

## 17. Post-injury unemployment as predictor of MDD

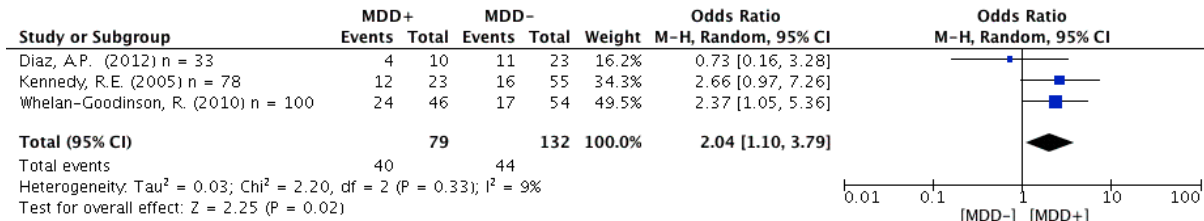

## 18. Post-injury litigation situation as predictor of MDD

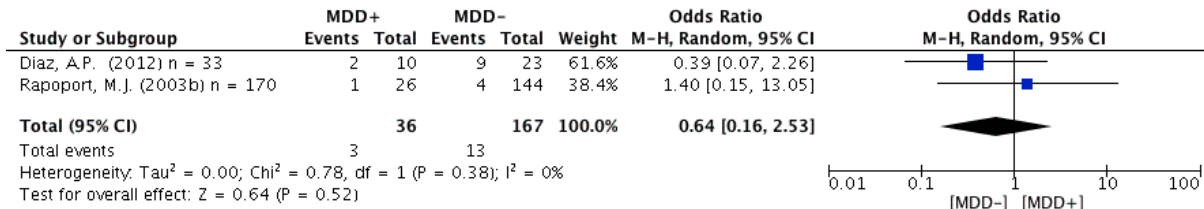

## B1. Meta-analyses of univariable predictors of PTSD

### Demographics

### 1. Age (continuous) as predictor of PTSD

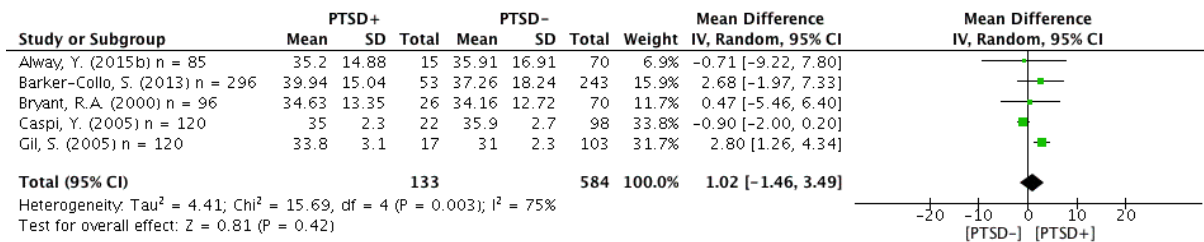

## 2. Female gender as predictor of PTSD

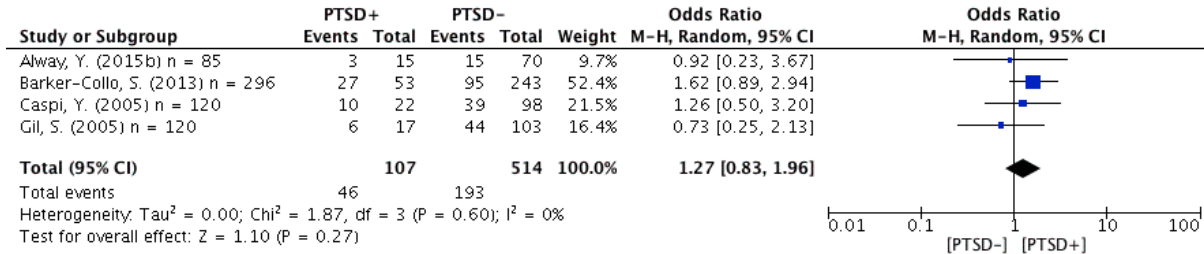

## 3. Education (continuous) as predictor of PTSD

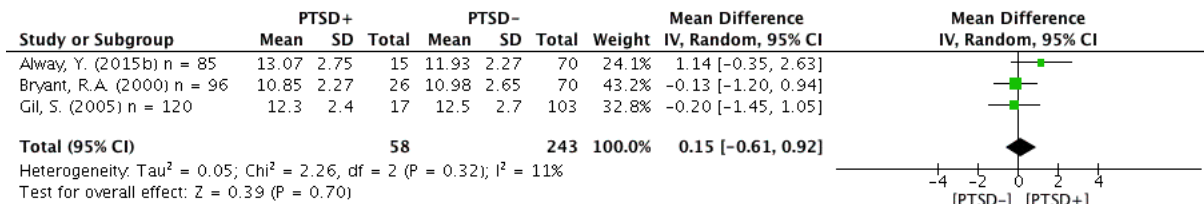

### Pre-injury variables

## 4. Pre-injury psychiatric disorder as predictor of PTSD

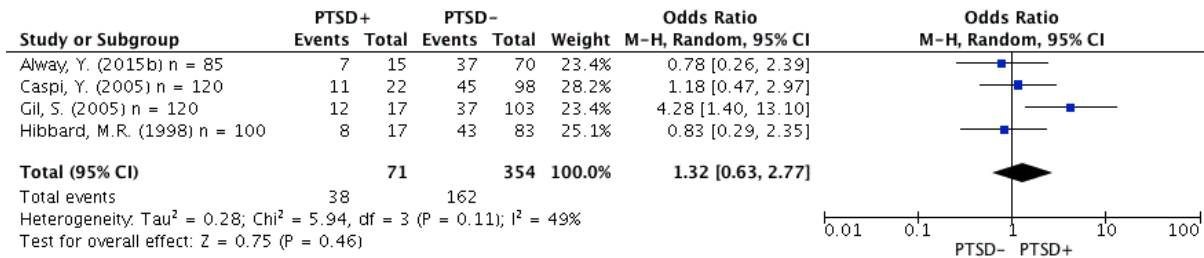

### Clinical variables

## 5. PTA (continuous) as predictor of PTSD

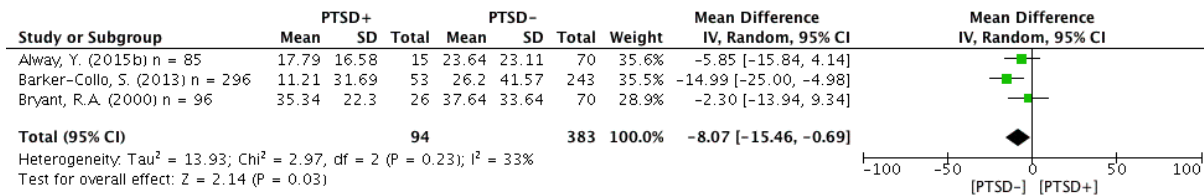

Post-injury variables

6. Memory of the traumatic event as predictor of PTSD

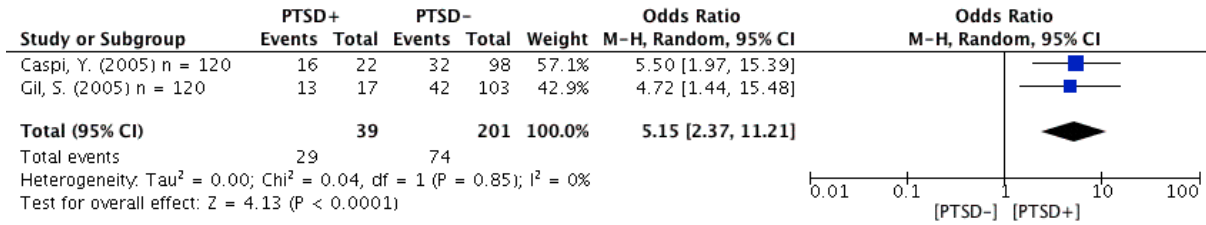

*Note.* Total number of patients in the study and total number of patients included in the meta-analyses may vary since for some variables, not all patients in the study were assessed (e.g. studies that included both MDD and PTSD)

**Supplemental C. Meta-analyses of univariable predictors of MDD and PTSD following Traumatic Brain Injury with only those studies using the DSM-IV criteria**

| Predictor                               | No. of participants<br>(No. of studies) | Pooled effect size meta-analysis<br>OR (95% CI)* | Heterogeneity<br>(I <sup>2</sup> ) |
|-----------------------------------------|-----------------------------------------|--------------------------------------------------|------------------------------------|
| <b>MDD</b>                              |                                         |                                                  |                                    |
| Age (/y, MD (95% CI))                   | 547 (6)**                               | 2.16 (-1.15 to 5.47)                             | 38%                                |
| Female Gender                           | 644 (6)**                               | 1.70 (1.05 to 2.74)                              | 34%                                |
| Education (/y, MD (95%CI))              | 207 (3)**                               | -0.78 (-1.91 to 0.36)                            | 47%                                |
| Caucasian race                          | 341 (3)                                 | 1.04 (0.61 to 1.75)                              | 0%                                 |
| Marital status †                        | 610 (6)                                 | 1.20 (0.82 to 1.75)                              | 0%                                 |
| Socioeconomic status ‡                  | 140 (2)                                 | 0.69 (0.33 to 1.43)                              | 0%                                 |
| Pre-injury depression                   | 470 (5)                                 | 3.86 (2.26 to 6.59)                              | 0%                                 |
| Pre-injury psychiatric disorders        | 363 (3)**                               | 1.18 (0.23 to 5.95)                              | 89%                                |
| Pre-injury alcohol abuse                | 244 (2)                                 | 1.49 (0.61 to 3.69)                              | 0%                                 |
| Pre-injury substance abuse              | 244 (2)                                 | 2.02 (0.75 to 5.42)                              | 0%                                 |
| Pre-injury unemployment                 | 244 (2)                                 | 3.80 (0.34 to 42.09)                             | 77%                                |
| Family history of psychiatric disorders | 170 (1)**                               | 1.16 (0.47 to 2.86)                              | NA                                 |
| Admission GCS (MD (95% CI))             | 151 (2)                                 | 0.49 (0.02 to 0.97)                              | 0%                                 |
| 24h GCS (MD (95% CI))                   | 74 (1)**                                | 0.70 (0.51 to 1.91)                              | NA                                 |
| CT abnormalities                        | 195 (2)**                               | 0.64 (0.29 to 1.40)                              | 0%                                 |

|                                  |          |                     |    |
|----------------------------------|----------|---------------------|----|
| Brain contusion                  | 37 (1)** | 2.22 (0.59 to 8.41) | NA |
| Post-injury unemployment         | 211 (3)  | 2.04 (1.10 to 3.79) | 9% |
| Post-injury litigation situation | 203 (2)  | 0.64 (0.16 to 2.53) | 0% |

|                                 |           |                          |     |
|---------------------------------|-----------|--------------------------|-----|
| PTSD                            |           |                          |     |
| Age (/y, MD (95% CI))           | 621 (4)** | 1.10 (-1.69 to 3.88)     | 81% |
| Female gender                   | 621 (4)   | 1.27 (0.83 to 1.96)      | 0%  |
| Education (/y, MD (95% CI))     | 205 (2)** | 0.41 (-0.90 to 1.71)     | 45% |
| Pre-injury psychiatric disorder | 425 (4)   | 1.32 (0.63 to 2.77)      | 49% |
| PTA (MD (95% CI))               | 381 (2)** | -10.41 (-19.37 to -1.46) | 33% |
| Memory of the traumatic event   | 240 (2)   | 5.15 (2.37 to 11.21)     | 0%  |

\*pooled OR (95% CI) unless otherwise specified

\*\* The original meta-analyses (Supplemental material B) contained studies using other criteria than the DSM-IV (e.g. DSM-III, ICD-10). As a consequence, these estimates changed in the sensitivity analyses with only those studies that used the DSM-IV criteria

‡ married/relationship vs. unattached

‡ Hollinghead classes IV and V vs. lower

*Abbreviations:* MD = mean difference; MDD = major depressive disorder; OR = odds ratio; TBI = traumatic brain injury; GCS = Glasgow Coma Scale; PTA = posttraumatic amnesia; CT = computed tomography; PTSD = posttraumatic stress disorder; LOC = loss of consciousness

## Supplemental material D: Narrative synthesis of variables not included in the meta-analysis

### MDD:

| Variable       | Study                      | Results                                                                                                                                                                                                                                           |
|----------------|----------------------------|---------------------------------------------------------------------------------------------------------------------------------------------------------------------------------------------------------------------------------------------------|
| Demographics   |                            |                                                                                                                                                                                                                                                   |
| Age            | Deb, S. (2007)             | Percentage patients with young age (18-65y) in MDD+ group: 79%, in MDD- group 72%, $p>.05$                                                                                                                                                        |
|                | Hibbard, M. (1998)         | No statistically significant differences                                                                                                                                                                                                          |
|                | Mauri, M.C. (2014)*        | Mean age MDD+: 37.1 (SD = 15), MDD-: 47.5 (SD=13), $p>.05$                                                                                                                                                                                        |
|                | Rao, V. (2010)*            | Mean age MDD+ 52.4 (SD = unknown); MDD- 27.3 (SD = unknown), $p<.001$                                                                                                                                                                             |
|                | Reekum, R. (1996)*         | Percentage patients under age 30: MDD+ 56%, MDD- 33%, $p>.05$                                                                                                                                                                                     |
|                | Whelan-Goodinson, R (2010) | No statistically significant differences                                                                                                                                                                                                          |
| Gender         | Hibbard, M. (1998)         | No statistically significant differences                                                                                                                                                                                                          |
|                | Rao, V. (2010)*            | No statistically significant differences                                                                                                                                                                                                          |
|                | Rapoport, M.J. (2005)      | No statistically significant differences                                                                                                                                                                                                          |
|                | Reekum, R. (1996)*         | MDD+ 7 (78%) females, MDD- 3 (33%) females, $p = .06$                                                                                                                                                                                             |
| Education      | Hibbard, M. (2004)         | No statistically significant differences                                                                                                                                                                                                          |
|                | Kennedy, R.E. (2005)       | In MDD+ group: less than high school 23%, high school graduate or some college 46%, college graduate or higher 32%; in MDD- group: less than high school 16%, high school graduate or some college 56%, college graduate or higher 27%, $p = .67$ |
|                | Mauri, M.C. (2014)*        | Mean years of education: MDD+ 13 (SD = 2.9), MDD- 13 (SD = 4.2), $p>.05$                                                                                                                                                                          |
| Race           | Federoff, J.P. (1992)      | Percentage of black patients: MDD+ 29%, MDD= 23%, $p>.05$                                                                                                                                                                                         |
| Marital status | Rapoport, M.J. (2005)      | No statistically significant differences                                                                                                                                                                                                          |

|                                         |                                |                                                                                                             |
|-----------------------------------------|--------------------------------|-------------------------------------------------------------------------------------------------------------|
|                                         | Whelan-Goodinson, R.<br>(2010) | No statistically significant differences                                                                    |
| Income                                  | Hibbard, M. (2004)             | Annual salary < 20.000 dollar: MDD+ 36%, MDD- 30%, p>.05                                                    |
|                                         | Jorge, R.E. (2004)             | Annual salary < 21.000 dollar: MDD+ 46%, MDD- 24%, p>.05                                                    |
| Location of residence                   | Whelan-Goodinson, R.<br>(2010) | No statistically significant differences                                                                    |
| Pre-injury variables                    |                                |                                                                                                             |
| Pre-injury depression                   | Gould, K.R. (2011b)            | OR = 5.25 (95% CI: 1.66 to 16.64), p = .005                                                                 |
|                                         | Rapoport, M.J. (2003)          | Chi square = 1.35 (df = 1), p = .25                                                                         |
| Pre-injury anxiety                      | Jorge, R.E. (2004)             | Percentage patients with pre-injury anxiety disorder: MDD+ 20%, MDD- 5%, p = .05                            |
| Pre-injury alcohol abuse                | Rapoport, M.J. (2005)          | No statistically significant differences                                                                    |
| Pre-injury substance abuse              | Gould, K.R. (2011)             | Chi square = 3.10 (df=1, n = 114), p = .78                                                                  |
|                                         | Rapoport, M.J. (2005)          | No statistically significant differences                                                                    |
| Pre-injury substance- or alcohol abuse  | Federoff, P.J. (1992)          | <i>Percentage pre-injury substance or alcohol abuse: MDD+ 47%, MDD- 24%, p &gt; .05</i>                     |
| Pre-injury unemployment                 | Rapoport, M.J. (2005)          | No statistically significant differences                                                                    |
|                                         | Whelan-Goodinson, R.<br>(2010) | No statistically significant differences                                                                    |
| Family history of psychiatric disorders | Jorge, R.E. (2004)             | No statistically significant differences                                                                    |
|                                         | Rapoport, M.J. (2005)          | No statistically significant differences                                                                    |
| Pre-injury counselling                  | Gould, K.R. (2011)             | Higher percentage pre-injury counselling in those with MDD:<br>Chi square = 5.43 (df = 1, n = 118), p = .02 |
| Pre-injury medical problems             | Rapoport, M.J. (2003)          | No statistically significant differences                                                                    |
| Pre-injury TBI                          | Rapoport, M.J. (2003b)         | Percentage pre-injury TBI: MDD+ 23%, MDD- 23%, p>.05                                                        |
|                                         | Rapoport, M.J. (2005)          | No statistically significant differences                                                                    |

|                                               |                             |                                                                                                                         |
|-----------------------------------------------|-----------------------------|-------------------------------------------------------------------------------------------------------------------------|
| Peri-injury variables                         |                             |                                                                                                                         |
| Mechanism of injury                           | Kennedy, R.E. (2005)        | Percentage violent injury: MDD+ 22%, MDD- 9%, $p = 0.13$                                                                |
|                                               | Rapoport, M.J. (2003)       | No statistically significant differences                                                                                |
|                                               | Rapoport, M.J. (2005)       | MVA: MDD+ 71%, MDD- 60%, Chi Square = 0.79 (df = 1), $p > .05$                                                          |
| Trauma severity                               | Mauri, M.C. (2014)          | Trauma severity score: MDD+ 2.3 (SD = 0.9), MDD- 1.4 (SD = 0.7), $p > .05$                                              |
| Clinical variables                            |                             |                                                                                                                         |
| GCS (continuous)                              | Jorge R.E. (1993)           | Mean GCS obtained at 24h post-injury: no statistically significant differences                                          |
|                                               | Kennedy, R.E. (2005)        | Lowest GCS score: MDD+ 10.0 (SD = 4.4), MDD- 9.0 (SD = 5.0), $p > .05$                                                  |
|                                               | Whelan-Goodinson, R. (2010) | No statistically significant differences (measurement = lowest preintubation GCS)                                       |
| GCS (division into mild, moderate and severe) | Federoff, P.J. (1992)       | MDD+: GCS 12-15 35%; GCS 8-11 24%; GCS 3-7 41%<br>MDD-: GCS 12-15 43%; GCS 8-11 26%; GCS 3-7 32%, $p > .05$             |
|                                               | Hibbard, M. (1998)          | No statistically significant differences                                                                                |
|                                               | Jorge, R.E. (2004)          | MDD+: mild: 47%, moderate 40%, severe 13%<br>MDD-: mild 48%, moderate 25%, severe 27%, $p > .05$                        |
|                                               | Kennedy, R.E. (2005)        | MDD+ GCS 13-15: 38%, GCS 9-12: 31%, GCS <9 31%<br>MDD-: GCS 13-15 33%, GCS 9-12 18%, GCS <9 49%, $p = .67$              |
|                                               | Reekum, R. (1996)*          | MDD+: severe TBI 56%, moderate TBI 22%, mild TBI 22%<br>MDD-: severe TBI 56%, moderate TBI 11%, mild TBI 33%, $p > .05$ |
| PTA                                           | Koponen, S. (2002)          | No statistically significant differences                                                                                |
|                                               | Rapoport, M.J. (2005)       | PTA > 24h: MDD+ 43%, MDD- 53%, Chi square = 0.6 (df = 1), $p = .32$                                                     |
|                                               | Whelan-Goodinson, R. (2010) | No statistically significant differences                                                                                |



|                    |                             |                                                                                                                                                                                                                                                                                                                                                                                                                                                                                                                                                                                            |
|--------------------|-----------------------------|--------------------------------------------------------------------------------------------------------------------------------------------------------------------------------------------------------------------------------------------------------------------------------------------------------------------------------------------------------------------------------------------------------------------------------------------------------------------------------------------------------------------------------------------------------------------------------------------|
| LOC                | Kennedy, R.E. (2005)        | MDD+: none 53%, 1-2h 26%, 3-14h 21%, >14h 0%<br>MDD-: none 43%, 1-2h 12%, 3-14h 22%, >14h 22%,<br>p = .10                                                                                                                                                                                                                                                                                                                                                                                                                                                                                  |
| Bodily injuries    | Gould, K. R. (2011)         | MDD+ more bodily injuries than MDD- , p = .049                                                                                                                                                                                                                                                                                                                                                                                                                                                                                                                                             |
|                    | Rapoport, M.J. (2005)       | Fractures or other significant injuries: MDD+ 60%, MDD- 67%,<br>p>.05                                                                                                                                                                                                                                                                                                                                                                                                                                                                                                                      |
|                    | Whelan-Goodinson, R. (2010) | No statistically significant differences                                                                                                                                                                                                                                                                                                                                                                                                                                                                                                                                                   |
| Pain               | Whelan-Goodinson, R. (2010) | Percentage with pain: MDD+ 57%; MDD- 28%, OR = 3.38 (95%<br>CI: 1.47 to 7.78), p = .004                                                                                                                                                                                                                                                                                                                                                                                                                                                                                                    |
| AIS score          | Jorge, R.E. (2004)          | MDD+ 16.7 (SD = 5.7); MDD- 18.0 (SD = 8.1), p>.05                                                                                                                                                                                                                                                                                                                                                                                                                                                                                                                                          |
| Comorbidities      | Rapoport, M.J. (2003b)      | MDD+: no comorbidity 15%, soft tissue only 50%, fractures<br>35%<br>MDD-: no comorbidity 22%, soft tissue 52%, fractures 26%,<br>p>.05                                                                                                                                                                                                                                                                                                                                                                                                                                                     |
| Imaging variables  |                             |                                                                                                                                                                                                                                                                                                                                                                                                                                                                                                                                                                                            |
| Total brain volume | Jorge, R.E.                 | MDD+ 1206 (SD = 149), MDD- 1311 (SD = 132), p>.05                                                                                                                                                                                                                                                                                                                                                                                                                                                                                                                                          |
|                    | Rao, V. (2010)*             | MDD+ 1064 (SD = 74), MDD- 1136 (SD = 140), p>.05                                                                                                                                                                                                                                                                                                                                                                                                                                                                                                                                           |
| MR abnormalities   | Jorge, R.E. (2004)          | % of gray matter at MR image - L orbitofrontal cortex: MDD+<br>2.1 (SD = 0.25), MDD- 2.1 (0.25), p>.05<br>% of gray matter at MR image - L medial frontal cortex: MDD+<br>1.5 (SD = 0.24), MDD- 1.6 (SD = 0.37), p>.05<br>% of gray matter at MR image - L lateral frontal cortex: MDD+<br>5.6 (SD =0.7); MDD-: 4.5 (SD = 0.9), Chi square = 10.5, p = .001<br>% of gray matter at MR image - L superior frontal gyrus:<br>MDD+<br>2.2 (SD = 0.4), MDD- 1.9 (SD = 0.3), p>.05<br>% of gray matter at MR image - L middle frontal gyrus: MDD+<br>2.2 (SD = 0.5), MDD- 1.7 (SD = 0.7), p>.05 |

|                                  |                    |                                                                                                                                                                                                                                                                                                                                                                                                                                                                                                                                                                                                                                                                                                                                                                                                                                              |
|----------------------------------|--------------------|----------------------------------------------------------------------------------------------------------------------------------------------------------------------------------------------------------------------------------------------------------------------------------------------------------------------------------------------------------------------------------------------------------------------------------------------------------------------------------------------------------------------------------------------------------------------------------------------------------------------------------------------------------------------------------------------------------------------------------------------------------------------------------------------------------------------------------------------|
|                                  |                    | <p>% of gray matter at MR image - L inferior frontal gyrus: MDD+ 1.2 (SD = 0.2); MDD- 0.9 (SD = 0.2), Chi square = 7,1, p = .008</p> <p>% of gray matter at MR image - R orbitofrontal cortex: MDD+ 2.1 (0.20); MDD- 2.1 (SD = 0.46), p&gt;.05</p> <p>% of gray matter at MR image - R medial frontal cortex: MDD+ 1.6 (SD = 0.30), MDD- 1.7 (SD = 0.43), p&gt;.05</p> <p>% of gray matter at MR image - R lateral frontal cortex: MDD+ 5.4 (SD = 0.7), MDD- 4.9 (SD = 1.2), p &gt;.05</p> <p>% of gray matter at MR image - R superior frontal gyrus: MDD+ 2.1 (SD = 0.3); MDD+ 1.9 (0.3), p&gt;.05</p> <p>% of gray matter at MR image - R middle frontal gyrus: MDD+ 2.2 (SD = 0.6); MDD- 2.0 (SD = 0.8), p&gt;.05</p> <p>% of gray matter at MR image - R inferior frontal gyrus: MDD+ 1.1 (SD = 0.2), MDD- 1.0 (SD = 0.3), p&gt;.05</p> |
| Diffuse injury at CT or MRI scan | Jorge, R.E. (2007) | Percentage diffuse injury: MDD+ 37%, MDD- 67%, p>.05                                                                                                                                                                                                                                                                                                                                                                                                                                                                                                                                                                                                                                                                                                                                                                                         |
| Intracranial hemorrhages         | Jorge, R.E. (2007) | Percentage intracranial hemorrhages: MDD+ 32%, MDD- 22%                                                                                                                                                                                                                                                                                                                                                                                                                                                                                                                                                                                                                                                                                                                                                                                      |
| Frontal lesions                  | Jorge, R.E. (2007) | Percentage frontal lesion: MDD+ 42%, MDD- 28%                                                                                                                                                                                                                                                                                                                                                                                                                                                                                                                                                                                                                                                                                                                                                                                                |
| Brain volume                     | Rao, V. (2010)*    | <p>Total gray brain volume: MDD+ 474.98 (SD = 72.8), MDD- 564.96 (SD = 93.9), p = .07</p> <p>Total white brain volume: MDD+ 588.08 (SD = 31.8); MDD 590.78 (SD = 61.2), p = .91</p> <p>Total left frontal lobe: MDD+ 150.47 (SD = 14.4); MDD- 153.31 (SD = 26.2), p = .79</p> <p>Left frontal lobe white matter: MDD+ 90.63 (SD = 10.2), MDD- 81.1 (SD = 13.1), p = .14</p> <p>Left frontal lobe grey matter: MDD+ 59.84 (SD = 10.3); MDD 72.19 (SD = 14.6), p = .08</p>                                                                                                                                                                                                                                                                                                                                                                     |

|  |  |                                                                                                                                                                                                                                                                                                                                                                                                                                                                                                                                                                                                                                                                                                                                                                                                                                                                                                                                                                                                                                                                                                                                                                                                                                                                                                                                                                                                                                                               |
|--|--|---------------------------------------------------------------------------------------------------------------------------------------------------------------------------------------------------------------------------------------------------------------------------------------------------------------------------------------------------------------------------------------------------------------------------------------------------------------------------------------------------------------------------------------------------------------------------------------------------------------------------------------------------------------------------------------------------------------------------------------------------------------------------------------------------------------------------------------------------------------------------------------------------------------------------------------------------------------------------------------------------------------------------------------------------------------------------------------------------------------------------------------------------------------------------------------------------------------------------------------------------------------------------------------------------------------------------------------------------------------------------------------------------------------------------------------------------------------|
|  |  | <p>Total right frontal lobe: MDD+ 155.49 (SD = 12.6); MDD- 160.55 (SD = 20.1), <math>p = .56</math></p> <p>Right frontal lobe white matter: MDD+ 95.13 (SD = 11.2); MDD-84.26 (SD = 9.0), <math>p = .07</math></p> <p>Right frontal lobe grey matter: MDD+ 60.4 (SD = 8.9), MDD- 76.3 (SD = 13.6), <math>p = .02</math></p> <p>Total left limbic lobe: MDD+ 54.02 (SD = 3.5), MDD-54.9 (SD = 8.7), <math>p = .78</math></p> <p>White left limbic lobe: MDD+ 26.8 (SD = 3.6), MDD- 25.0 (SD = 4.5), <math>p = .40</math></p> <p>Gray left limbic lobe: MDD+ 27.14 (SD = 2.8); MDD-29.90 (SD = 5.6), <math>p = .30</math></p> <p>Total right limbic lobe: MDD+: 50.0 (SD = 3.8); MDD- 52.03 (SD = 5.9), <math>p = .43</math></p> <p>White right limbic lobe: MDD+ 22.5 (SD = 2.6); MDD- 20.8 (SD = 2.7), <math>p = .23</math></p> <p>Gray right limbic lobe: MDD+ 27.50 (SD = 4.4); MDD- 31.27 (SD = 4.25), <math>p = .12</math></p> <p>Total left occipital lobe: MDD+ 41.99 (SD = 5.2); MDD- 53.48 (SD = 7.31), <math>p = .004</math></p> <p>White left occipital lobe: MDD+ 24.49 (SD = 3.37); MDD- 29.65 (SD = 6.1), <math>p = .06</math></p> <p>Gray left occipital lobe: MDD+ 17.50 (SD = 4.12); MDD- 23.82 (SD = 4.3), <math>p = .01</math></p> <p>Total right occipital lobe: MDD+ 42.57 (SD = 9.06), MDD-50.57 (SD = 8.46), <math>p = .11</math></p> <p>White right occipital lobe: MDD+ 24.63 (SD = 5.07); 27.66 (SD = 6.1), <math>p = .32</math></p> |
|--|--|---------------------------------------------------------------------------------------------------------------------------------------------------------------------------------------------------------------------------------------------------------------------------------------------------------------------------------------------------------------------------------------------------------------------------------------------------------------------------------------------------------------------------------------------------------------------------------------------------------------------------------------------------------------------------------------------------------------------------------------------------------------------------------------------------------------------------------------------------------------------------------------------------------------------------------------------------------------------------------------------------------------------------------------------------------------------------------------------------------------------------------------------------------------------------------------------------------------------------------------------------------------------------------------------------------------------------------------------------------------------------------------------------------------------------------------------------------------|

|  |                    |                                                                                                                                                                                                                                                                                                                                                                                                                                                                                                                                                                                                                                                                                                                                                                                                                                                                                                                                                                                                                                                                                                                                                                                                                                                                                                                                                                     |
|--|--------------------|---------------------------------------------------------------------------------------------------------------------------------------------------------------------------------------------------------------------------------------------------------------------------------------------------------------------------------------------------------------------------------------------------------------------------------------------------------------------------------------------------------------------------------------------------------------------------------------------------------------------------------------------------------------------------------------------------------------------------------------------------------------------------------------------------------------------------------------------------------------------------------------------------------------------------------------------------------------------------------------------------------------------------------------------------------------------------------------------------------------------------------------------------------------------------------------------------------------------------------------------------------------------------------------------------------------------------------------------------------------------|
|  |                    | <p>Gray right occipital lobe: MDD+ 17.93 (SD = 5.8), MDD- 22.9 (SD = 4.7), <math>p = .11</math></p> <p>Total left temporal lobe: MDD+ 74.11 (SD = 5.7); MDD- 81.69 (SD = 9.6), <math>p = .08</math></p> <p>White left temporal lobe: MDD+ 33.96 (SD = 2.15), MDD- 35.63 (SD = 4.96), <math>p = .39</math></p> <p>Gray left temporal lobe: MDD+ 40.14 (SD = 5.4); MDD- 46.06 (SD = 5.90), <math>p = .07</math></p> <p>Total right temporal lobe: MDD+ 74.24 (SD = 9.12); MDD- 81.60 (SD = 9.9), <math>p = .16</math></p> <p>White left temporal lobe: MDD+ 33.59 (SD = 4.51); MDD- 34.82 (SD = 5.68), <math>p = .65</math></p> <p>Gray left temporal lobe: MDD+ 40.65 (SD = 6.36); MDD- 46.77 (SD = 5.87), <math>p = .08</math></p> <p>Total left parietal lobe: MDD+ 53.84 (SD = 6.37), MDD- 59.20 (SD = 5.32), <math>p = .11</math></p> <p>White left parietal lobe: MDD+ 29.56 (SD = 3.4), MDD- 29.03 (SD = 5.1), <math>p = .81</math></p> <p>Gray left parietal lobe: MDD+ 24.28 (SD = 6.16), MDD- 30.17 (SD = 4.24), <math>p = .06</math></p> <p>Total right parietal lobe: MDD+ 57.04 (SD = 9.26); MDD- 63.44 (SD = 6.36), <math>p = .17</math></p> <p>White right parietal lobe: MDD+ 31.46 (SD = 2.7), MDD- 31.09 (SD = 6.59), <math>p = .88</math></p> <p>Gray right parietal lobe: MDD+ 25.58 (SD = 6.9), MDD- 32.34 (SD = 5.06), <math>p = .06</math></p> |
|  | Jorge, R.E. (2007) | <p>Left frontal lobe grey matter (% of TIV): MDD+ 8.9 (SD = 0.6), MDD- 9.4 (SD = 0.6), <math>F = 7.8</math>, <math>p = .009</math></p>                                                                                                                                                                                                                                                                                                                                                                                                                                                                                                                                                                                                                                                                                                                                                                                                                                                                                                                                                                                                                                                                                                                                                                                                                              |

|                                                      |                        |                                                                                                                                                                                                                                                                                            |
|------------------------------------------------------|------------------------|--------------------------------------------------------------------------------------------------------------------------------------------------------------------------------------------------------------------------------------------------------------------------------------------|
|                                                      |                        | Right frontal lobe grey matter (% of TIV): MDD+ 9.4 (SD = 0.9),<br>MDD- 9.7 (SD = 0.6),<br>Hippocampal volume (left): MDD+ group has significantly<br>lower hippocampal volumes, p = .04<br>Hippocampal volume (right): MDD+ group has significantly<br>lower hippocampal volumes, p = .03 |
| Choline/creatine ratio in<br>the right basal ganglia | Rao, V. (2010)*        | MDD+ 1.6 (SD = 2.0), MDD- 2.0 (SD = 0.43), p = .02                                                                                                                                                                                                                                         |
| N-acetylaspartate/creatine<br>ratio                  | Rao, V. (2010)*        | MDD+ 1.7 (SD = 0.36), MDD- 2.2 (SD = 0.68), p = .06                                                                                                                                                                                                                                        |
| Post-injury variables                                |                        |                                                                                                                                                                                                                                                                                            |
| Post-injury unemployment                             | Hibbard, M. (1998)     | No statistically significant differences                                                                                                                                                                                                                                                   |
| Post-injury rehabilitation                           | Reekum, R. (1996)*     | Inpatient rehabilitation: MDD+ 33%, MDD- 56%                                                                                                                                                                                                                                               |
| Post-injury depression                               | Gould, K.R. (2011)     | Post-injury depression is related to MDD<br>Measured with SCID: p = .006<br>Measured with HADS: p = .031                                                                                                                                                                                   |
| Post-injury anxiety                                  | Gould, K.R. (2011)     | No statistically significant differences                                                                                                                                                                                                                                                   |
| Post-injury anxiety or<br>depression                 | O'Donnell, M.L. (2008) | Area Under the Curve 0.72 (SE = .053, p = .001)                                                                                                                                                                                                                                            |
| MDD screening instrument<br>(PAS-D)†                 | O'Donnell, M.L. (2008) | Area Under the Curve 0.77 (SE .07, p <.001), cut-off of 4<br>results in sensitivity of 0.7, specificity of 0.8.                                                                                                                                                                            |
| Alexithymia                                          | Koponen, S. (2005)     | Score on TAS-20: MDD+ 69.0 (SD = 13.1); MDD- 52.5 (SD =<br>12.6), p>.05                                                                                                                                                                                                                    |
| Neuropsychological test<br>results                   | Jorge, R.E. (2004)     | Rey auditory verbal learning test: MDD+ 8.33 (SD = 2.77),<br>MDD- 9.93 (SD = 3.14), Cohen's d = 0.52, p >.05<br>Rey complex figure test score: MDD+ 14.50 (SD = 8.10), MDD-<br>17.64 (SD = 5.31), Cohen's d = 0.52, p >.05                                                                 |

|                          |                       |                                                                                                                                                                                                                                                                                                                                                                                                                                                                                                                                                                                                                                                                                                                               |
|--------------------------|-----------------------|-------------------------------------------------------------------------------------------------------------------------------------------------------------------------------------------------------------------------------------------------------------------------------------------------------------------------------------------------------------------------------------------------------------------------------------------------------------------------------------------------------------------------------------------------------------------------------------------------------------------------------------------------------------------------------------------------------------------------------|
|                          |                       | <p>Wisconsin card sorting test (perseverative errors): MDD+ 13.92 (SD = 11.09), MDD- 7.95 (SD = 5.17), Cohen's d = 0.82, p = .03</p> <p>Wisconsin card sorting test (categories achieved): MDD+ 2.25 (SD = 1.60), MDD- 3.33 (SD = 1.49), Cohen's d = 0.69, p&gt;.05</p> <p>Trail making test (A): MDD+ 37.08 (SD = 15.18), MDD- 31.90 (SD = 15.24), Cohen's d = 0.34, p &gt;.05</p> <p>Trail making test (B/A ratio): MDD+ 3.44 (SD = 1.60), MDD- 2.49 (SD = .80), Cohen's d = 0.87, p = .02</p> <p>Stroop test: MDD+ 31.83 (SD = 10.30), MDD- 38.05 (SD = 9.92), Cohen's d = 0.61, p &gt;.05</p> <p>Multilingual aphasia examination score: MDD+ 34.08 (SD = 12.06), MDD- 36.29 (SD = 12.73), Cohen's d = 0.18, p&gt;.05</p> |
| Other                    |                       |                                                                                                                                                                                                                                                                                                                                                                                                                                                                                                                                                                                                                                                                                                                               |
| Intelligence coefficient | Mauri. M.C. (2014)*   | Mean IQ MDD+ 104 (SD = 11), MDD- 112 (SD = 15), p>.05                                                                                                                                                                                                                                                                                                                                                                                                                                                                                                                                                                                                                                                                         |
|                          | Rao, V. (2010)*       | Mean IQ MDD+ 105 (SD = 15); MDD- 102 (SD = 9), p=.67                                                                                                                                                                                                                                                                                                                                                                                                                                                                                                                                                                                                                                                                          |
|                          | Rapoport, M.J. (2005) | No statistically significant differences                                                                                                                                                                                                                                                                                                                                                                                                                                                                                                                                                                                                                                                                                      |
| Left handedness          | Federoff, J.P. (1992) | Percentage left handedness: MDD+ 6%, MDD- 9%, p>.05                                                                                                                                                                                                                                                                                                                                                                                                                                                                                                                                                                                                                                                                           |

\*Study excluded from meta-analysis because high risk of bias or included less than 20 patients

† Screening instrument was based on 3 pre-injury items (professional help in past, previous traumatic events, support) and 2 post-injury items (feeling irritable or angry, difficulty concentrating)

**PTSD:**

| Variable                     | Study                   | Results                                                                                                     |
|------------------------------|-------------------------|-------------------------------------------------------------------------------------------------------------|
| <b>Demographics</b>          |                         |                                                                                                             |
| Age                          | Li, L. (2016)*          | Mean age PTSD+: 35.8 (SD = 7.6), PTSD-: 36.7 (SD=7.1), $p > .05$                                            |
| Gender                       | Ashman, T.A.. (2000)    | Significantly more women than men fit the criteria for PTSD ( $p = .04$ )                                   |
|                              | Li, L. (2016)*          | Female: PTSD+ 12 (57%) , PTSD- 10 (45%), $p > .05$                                                          |
| Education (years)            | Caspi, Y. (2005)        | No statistically significant differences                                                                    |
|                              | Li, L. (2016)*          | Mean years of education PTSD+ 12.71 (SD = 2.8), PTSD- 13.3 (SD = 2.9), $p > .05$                            |
| Ethnicity                    | Barker-Collo, S. (2013) | Percentage European ethnicity: PTSD+ 57%, PTSD- 68%, $p = .38$                                              |
| Marital Status               | Gil, S. (2005)          | Percentage married: PTSD+ 52%, PTSD- 49%, $p > .05$                                                         |
| Country of origin            | Gil, S. (2005)          | Percentage native Israeli: PTSD+ 64%, PTSD- 68%, $p > .05$                                                  |
| <b>Pre-injury variables</b>  |                         |                                                                                                             |
| Pre-injury employment        | Bryant, R.A. (2000)     | Percentage employed: PTSD+ 79%, PTSD- 81%, $p > .05$                                                        |
| Pre-injury physical injury   | Gil, S. (2005)          | Percentage physical injury: PTSD+ 23%, PTSD- 20%, $p > .05$                                                 |
| Pre-injury PTSD              | Barker-Collo, S. (2013) | None of the patients had a pre-injury PTSD                                                                  |
| Pre-injury depression        | Barker-Collo, S. (2013) | Percentage pre-injury depression: PTSD+ 28%, PTSD- 19%, $p = 0.51$                                          |
| Pre-injury anxiety           | Barker-Collo, S. (2013) | Percentage pre-injury anxiety disorder: PTSD+ 15%, PTSD- 6%, $p = .05$                                      |
| <b>Peri-injury variables</b> |                         |                                                                                                             |
| Injury mechanism             | Barker-Collo, S. (2013) | PTSD+: traffic 21%, fall 26%, assault 30%<br>PTSD-: traffic 17%, fall 31%, assault 20%, $p = .90$           |
|                              | Caspi, Y. (2005)        | No statistically significant differences                                                                    |
|                              | Li, L. (2016)*          | PTSD+: traffic 67%, blows to the head 24%, falls 9%<br>PTSD-: traffic 77%, blows to the head 14%, falls 9%) |

|                                |                         |                                                                                                                                                                                                                                                                                                              |
|--------------------------------|-------------------------|--------------------------------------------------------------------------------------------------------------------------------------------------------------------------------------------------------------------------------------------------------------------------------------------------------------|
| Place of injury                | Barker-Collo, S. (2013) | PTSD+: home 28%, street 32%, work 17%<br>PTSD-: home 33%, street 28%, work 11%                                                                                                                                                                                                                               |
| Intentional injury             | Barker-Collo, S. (2013) | Percentage intentional injury: PTSD+ 34%, PTSD- 22%, p = .25                                                                                                                                                                                                                                                 |
| Alcohol involved in injury     | Barker-Collo, S. (2013) | Percentage alcohol involved: PTSD+ 25%, PTSD- 26%, p = .24                                                                                                                                                                                                                                                   |
| Drugs involved in injury       | Barker-Collo, S. (2013) | Percentage drugs involved: PTSD+ 11%, PTSD- 6%, p = .01                                                                                                                                                                                                                                                      |
| Clinical variables and imaging |                         |                                                                                                                                                                                                                                                                                                              |
| GCS                            | Alway (2015b)           | Mean GCS: PTSD+ 13.91 (SD = 2.22), PTSD- 14.13 (SD = 2.32), p = 0.43<br>PTSD+:GCS 13-15: 53%, GCS 9-12: 13%, GCS 3-8 27%<br>PTSD-: GCS 13-15: 33%, GCS 9-12 13%, GCS 3-8 34%, p>.01                                                                                                                          |
|                                | Barker-Collo, S. (2013) | Mean worst GCS PTSD+: 13.91 (SD = 2.22), PTSD- 14.13 (SD = 2.32), p = 0.43<br>PTSD+: mild TBI 91%, PTSD-: mild TBI 95%, p = 0.84                                                                                                                                                                             |
|                                | Bryant, R.A. (2000)     | Mean GCS: PTSD+ 6.92 (SD = 3.52), PTSD- 2.60 (SD = 1.79), p>.05                                                                                                                                                                                                                                              |
| LOC                            | Roitman, P. (2013)      | Percentage patients with LOC: PTSD+ 39%, PTSD- 24%, OR = 1.72 (95% CI: 1.22-2.42)                                                                                                                                                                                                                            |
|                                | Barker-Collo, S. (2013) | Mean days LOC: PTSD+ 4.0 (SD = 6.16), PTSD- 9.04 (SD = 28.57), p = .07                                                                                                                                                                                                                                       |
|                                | Li, L. (2016)*          | Minutes LOC: PTSD+ 5.7 (SD = 5.8); PTSD- 3.72 (SD = 4.1)                                                                                                                                                                                                                                                     |
| PTA                            | Li, L. (2016)*          | Hours PTA: PTSD+ 3.8 (SD = 6.8), PTSD- 2.9 (Sd = 7.3)                                                                                                                                                                                                                                                        |
| ISS                            | Gil, S. (2005)          | Mean ISS: PTSD+ 6.0 (SD = 3.9), PTSD- 5.8 (SD = 3.3), p>.05                                                                                                                                                                                                                                                  |
| CT abnormalities               | Barker-Collo, S. (2013) | No lesion: PTSD+ 93%, PTSD- 96%, p = .24                                                                                                                                                                                                                                                                     |
| MRI abnormalities              | Li, L. (2016)*          | PTSD+ increased mean diffusivity in subacute and chronic phase and decreased fractional anisotropy in chronic phase in several white matter regions. Most discriminant regions include corpus callosum, inferior fronto-occipital fasciculus, unicate fasciculus, superior longitudinal fasciculus, inferior |



|                               |                         |                                                                                                                                                                                                                                                                                                                                                                                                                                                                                                        |
|-------------------------------|-------------------------|--------------------------------------------------------------------------------------------------------------------------------------------------------------------------------------------------------------------------------------------------------------------------------------------------------------------------------------------------------------------------------------------------------------------------------------------------------------------------------------------------------|
|                               |                         | longitudinal fasciculus, anterior thalamic radiation, and corticospinal tract.                                                                                                                                                                                                                                                                                                                                                                                                                         |
| Post-injury variables         |                         |                                                                                                                                                                                                                                                                                                                                                                                                                                                                                                        |
| Surgery                       | Barker-Collo, S. (2013) | PTSD+: neurosurgery 4%, orthopedic surgery 4%, other surgery 6%<br>PTSD-: neurosurgery 0.4%, orthopedic surgery 4%, other surgery 2%, $p = .18$                                                                                                                                                                                                                                                                                                                                                        |
| Memory of the traumatic event | Turnbull, S.J. (2001)*  | No statistically significant differences                                                                                                                                                                                                                                                                                                                                                                                                                                                               |
| Acute PTSD symptoms           | Gil, S. (2005)          | PTSD according to CAPS 1 wk post-injury: PTSD+ 39%, PTSD- 32%, $p > .05$<br>PTSD according to CAPS 1 month post-injury: PTSD+ 43%, PTSD- 34%, $p < .01$<br>PTSD according to PSS 1 wk post-injury: PTSD+ 38%, PTSD- 34%, $p > .05$<br>PTSD according to PSS 1 month post-injury: PTSD+ 39%, PTSD- 30%, $p < .01$                                                                                                                                                                                       |
|                               | Li, L. (2016)*          | 1 month CAPS total score: PTSD+: 34.23 (SD 3.13); PTSD- 13.81 (SD = 3.05); $p < .001$ .                                                                                                                                                                                                                                                                                                                                                                                                                |
| ASD                           | Bryant, R.A. (1998)     | Percentage patients with ASD: PTSD+ 60%, PTSD- 4%<br>Percentage patients with fearful response (ASD symptom): PTSD+ 53%, PTSD- 27%, Chi Square = 2.46, $p > .003$<br>Percentage patients with helplessness (ASD symptom): PTSD+ 40%, PTSD- 38%, Chi Square = 0.02, $p < .003$<br>Percentage patients with numbing (ASD symptom): PTSD+ 67%, PTSD- 15%, Chi Square = 13.20, $p < .003$<br>Percentage patients with reduced awareness (ASD symptom): PTSD+ 53%, PTSD- 15%, Chi square = 7.44, $p > .003$ |

|  |  |                                                                                                                                                                                                                                                                                                                                                                                                                                                                                                                                                                                                                                                                                                                                                                                                                                                                                                                                                                                                                                                                                                                                                                                                                                                                                                                                                                                                                                                                                                                                                                                                                                                                                                                                                                                                                                                                                                      |
|--|--|------------------------------------------------------------------------------------------------------------------------------------------------------------------------------------------------------------------------------------------------------------------------------------------------------------------------------------------------------------------------------------------------------------------------------------------------------------------------------------------------------------------------------------------------------------------------------------------------------------------------------------------------------------------------------------------------------------------------------------------------------------------------------------------------------------------------------------------------------------------------------------------------------------------------------------------------------------------------------------------------------------------------------------------------------------------------------------------------------------------------------------------------------------------------------------------------------------------------------------------------------------------------------------------------------------------------------------------------------------------------------------------------------------------------------------------------------------------------------------------------------------------------------------------------------------------------------------------------------------------------------------------------------------------------------------------------------------------------------------------------------------------------------------------------------------------------------------------------------------------------------------------------------|
|  |  | <p>Percentage patients with derealization (ASD symptom): PTSD+ 67%, PTSD- 21%, Chi square = 9.07, <math>p &gt; .003</math></p> <p>Percentage patients with depersonalization (ASD symptom): PTSD+ 47%, PTSD- 4%, Chi square = 13.57, <math>p &lt; .003</math></p> <p>Percentage patients with dissociative amnesia (ASD symptom): PTSD+ 100%, PTSD- 100%</p> <p>Percentage patients with recurrent images and thoughts (ASD symptom): PTSD+ 47%, PTSD- 6%, Chi square = 11.12, <math>p &lt; .003</math></p> <p>Percentage patients with nightmares (ASD symptom): PTSD+ 40%, PTSD- 8%, Chi square = 6.37, <math>p &gt; .003</math></p> <p>Percentage patients with sense of reliving the trauma (ASD symptom): PTSD+ 20%, PTSD- 2%, Chi square = 3.52, <math>p &gt; .003</math></p> <p>Percentage patients with distress on exposure (ASD symptom): PTSD+ 67%, PTSD- 21%, Chi square = 9.07, <math>p &gt; .003</math></p> <p>Percentage patients with avoidance of thoughts or talk (ASD symptom): PTSD+ 60%, PTSD- 8%, Chi square = 15.61, <math>p &lt; .003</math></p> <p>Percentage patients with avoidance of places of people (ASD symptom): PTSD+ 67%, PTSD- 13%, Chi square = 14.95, <math>p &lt; .003</math></p> <p>Percentage patients with insomnia (ASD symptom): PTSD+ 87%, PTSD- 27%, Chi square = 14.37, <math>P &lt; .003</math></p> <p>Percentage patients with irritability (ASD symptom): PTSD+ 73%, PTSD- 23%, Chi square = 10.66, <math>p &lt; .003</math></p> <p>Percentage patients with poor concentration (ASD symptom): PTSD+ 67%, PTSD- 29%, Chi square = 5.32, <math>p &gt; .003</math></p> <p>Percentage patients with hypervigilance (ASD symptom): PTSD+ 87%, PTSD- 52%, Chi square = 4.36, <math>p &gt; .003</math></p> <p>Percentage patients with exaggerated startle response (ASD symptom): PTSD+ 53%, PTSD- 13%, Chi square = 8.79, <math>p &gt; .003</math></p> |
|--|--|------------------------------------------------------------------------------------------------------------------------------------------------------------------------------------------------------------------------------------------------------------------------------------------------------------------------------------------------------------------------------------------------------------------------------------------------------------------------------------------------------------------------------------------------------------------------------------------------------------------------------------------------------------------------------------------------------------------------------------------------------------------------------------------------------------------------------------------------------------------------------------------------------------------------------------------------------------------------------------------------------------------------------------------------------------------------------------------------------------------------------------------------------------------------------------------------------------------------------------------------------------------------------------------------------------------------------------------------------------------------------------------------------------------------------------------------------------------------------------------------------------------------------------------------------------------------------------------------------------------------------------------------------------------------------------------------------------------------------------------------------------------------------------------------------------------------------------------------------------------------------------------------------|

|                                    |                        |                                                                                                                 |
|------------------------------------|------------------------|-----------------------------------------------------------------------------------------------------------------|
|                                    |                        | Percentage patients with motor restlessness (ASD symptom):<br>PTSD+ 33%, PTSD- 0%, Chi square = 13.12, p < .003 |
|                                    | O'Donnell, M.L. (2008) | ASDI 8d: Sensitivity 0.82, Specificity 0.19, correctly classifies 75% of the participants                       |
| Dissociative reactions             | Gil, S. (2005)         | No statistically significant differences                                                                        |
| Post-injury depression             | Gil, S. (2005)         | More post-injury depression in those with PTSD compared to those without PTSD post-injury                       |
| Post-injury anxiety                | Gil, S. (2005)         | More post-injury anxiety in those with PTSD compared to those without PTSD post-injury                          |
| PTSD screening instrument (PAS-P)† | O'Donnell, M.L. (2008) | Area Under the Curve 0.91 (SE .07, p < .001), cut-off of 16 results in sensitivity of 0.8, specificity of 0.8.  |
| Pending compensation               | Harvey, A.G. (2000)    | No statistically significant differences                                                                        |

\*Study excluded from meta-analysis because high risk of bias or included less than 20 patients

† Screening instrument was based on 4 pre-injury items (professional help in past, previous traumatic events, support, talking about own thoughts), 2 peri-injury items (feeling terrified helpless or horrified and thinking about going to die) and 4 post-injury items (feeling irritable or angry, difficulty concentrating, confidence and acceptance)
